# Supplementary material for: Caught in the crossfire: Fears of Chinese–American scientists
Source: PubMed Central journal article supplement — Proc Natl Acad Sci U S A. 2023 Jun 27;120(27):e2216248120. doi: 10.1073/pnas.2216248120 (PMC10318999; doi:10.1073/pnas.2216248120), 2023-06-27
Supplement: pnas.2216248120.sapp.pdf [file pnas.2216248120.sapp.pdf]

Supplementary Materials for

**Caught in the Crossfire: Fears of Chinese-American Scientists**

Yu Xie<sup>1\*</sup>

Xihong Lin<sup>2</sup>

Ju Li<sup>3</sup>

Qian He<sup>1</sup>

Junming Huang<sup>1</sup>

---

1. Center on Contemporary China, Princeton University, Princeton, NJ 08544.

2. Department of Biostatistics and Department of Statistics, Harvard University, 655 Huntington Avenue, Boston, MA 02115.

3. Department of Nuclear Science & Engineering, Massachusetts Institute of Technology, 77 Massachusetts Avenue, Cambridge, MA 02139

\* Corresponding author: [yuxie@princeton.edu](mailto:yuxie@princeton.edu).

### Supplementary Materials 1: Ph.D. Students from China

We calculated the number of science and engineering (S/E) Ph.D. recipients and those of them holding temporary visas in the US in 2020 from data reported by the National Science Foundation (NSF) Survey of Earned Doctorates (1). We aggregated the data (“Doctorate recipients, by broad field of study and citizenship status: Selected years, 1975–2020”) in the Survey of Earned Doctorates data tables across four major fields: life sciences, physical sciences and earth sciences, mathematics and computer sciences, and engineering. We then obtained the number of S/E Ph.D. recipients from China in Table 26 (“Top 10 countries of origin of temporary visa holders earning US doctorates, by country of citizenship and field of study: 2010–20”). The numerical results are given in Table S1.

**Table S1: Number of S/E Ph.D. in 2020 by immigration status and Chinese origin**

|                                          | Numbers |
|------------------------------------------|---------|
| Total                                    | 33,676  |
| US citizen or permanent resident         | 18,338  |
| Temporary visa holder from all countries | 15,338  |
| From China                               | 5,730   |

The NSF also reports “stay rates,” percentages of US doctorate recipients holding temporary visas who intend to stay in the US by countries of origin (2). For all temporary visa holders, the average stay rate in 2005–2015 was 73.7%. For those from China, the average stay rate was 87.2%.

## **Supplementary Materials 2: Asian American Academic Climate Survey**

The Asian American Scholar Forum (AASF) ([aasforum.org](http://aasforum.org)) conducted an online survey of Asian American faculty in the US between December 2021 and March 2022. The stated objective of the survey was to understand challenges and experiences of Asian American scholars in their research and educational environments, including their perceptions of academic climate, academic activities, and mental and physical well-being. We designed the survey questionnaire and helped field the survey. To protect the confidentiality of the respondents, the survey began with a consent form and a promise that their responses would be collected and analyzed anonymously. In collaboration with various professional associations, the AASF sent the survey to intended respondents nationwide. Specifically, AASF asked all of its 55 members to forward the invitation message with the link to the survey to Chinese-American faculty members; AASF emailed the presidents of the following 11 Chinese-American professional associations that co-sponsored the AASF webinar series, asking them to forward the survey to their members (see below for the list).

1. Association of Chinese Scholars in Computing
2. Chinese-American Chemistry & Chemical Biology Professors Association
3. Chinese-American Oceanic and Atmospheric Association
4. Chinese Biological Investigator Society (CBIS)
5. International Chinese Statistical Association
6. North America Federation of Tsinghua Alumni Associations
7. Peking University Alumni Association of New England
8. Peking University Alumni Association of Washington DC
9. The Society of Chinese Bioscientists in America (SCBA)
10. Tsinghua Alumni Academia Club of North America
11. US Chinese Scholar Association of Combustion Institute

We obtained valid responses from 1,394 respondents. All participants signed the consent forms. For the analyses reported in this paper, we excluded 37 observations who self-identified as non-Chinese Asian American and 18 observations of missing Asian ethnicity. We further excluded 5 observations from graduate students and 30 observations for whom the current

position was either missing or in industry. The aforementioned case exclusion criteria left us with a total of 1,304 observations of Chinese-American faculty. We then excluded 75 cases containing any missing values in the covariates for the logistic regression analysis. Therefore, the main analytic sample size for predicting scholars' intention of relocating outside the US is 1,229, and the analytic sample size for predicting scholars' intention of avoiding federal grant applications is 934 (further restricted to those who had even been awarded grants from US government agencies). In Table S2, we provide the main descriptive statistics from the survey.

Methodologically, two sources of potential bias could be present in the AASF survey. The first is called "sample selection bias": potential respondents were more likely to participate in the AASF survey if they already perceived themselves to have been impacted by the China Initiative. The second is called "social desirability bias": respondents knew the objective of the AASF survey and may have supplied information consistent with the objective. Note that both sources of bias are in the direction of exaggeration of the negative impact of the China Initiative. Therefore, the results reported in this article should be interpreted with caution.

**TABLE S2. Descriptive Summary for the Main Analytical Sample of AASF Survey Data (n=1299)**

|                                                                                 | Percentages |
|---------------------------------------------------------------------------------|-------------|
| <b>Intention of Relocating Abroad (Either Asian or non-Asian Countries)</b>     | 61%         |
| Intention to relocate to Asian countries                                        | 47%         |
| Intention to relocate to non-Asian countries                                    | 46%         |
| <b>Intention of Avoiding Federal Grants<sup>1</sup></b>                         | 45%         |
| <b>Have Been Awarded a US Federal Grant</b>                                     | 77%         |
| <b>Intention of Contributing to the US Leadership in Science and Technology</b> | 89%         |
| <b>Perceptions of Current Academic Climate:</b>                                 |             |
| Feel unwelcome as an academic researcher in the US                              | 35%         |
| Do not feel safe as an academic researcher in the US                            | 72%         |
| Fearful of conducting research in the US                                        | 42%         |
| Worried about collaborations with China                                         | 65%         |
| It is more difficult to recruit top international students now                  | 86%         |
| Received disclosure inquiries from my institution in the last two years         | 42%         |
| <b>Sense of Belonging to Local Institution and Professional Community:</b>      |             |
| Feel that I belong                                                              | 55%         |
| Neutral                                                                         | 28%         |
| Feel that I don't belong                                                        | 17%         |
| <b>How Often Have You Been Bullied under Professional Settings Last Year?</b>   |             |
| Never                                                                           | 25%         |
| Rarely/Sometimes                                                                | 59%         |

|                                                                                              |     |
|----------------------------------------------------------------------------------------------|-----|
| Often/Most of the time                                                                       | 10% |
| Not Sure                                                                                     | 6%  |
| <b>How Often Have You Been Insulted by Others under Non-professional Settings Last Year?</b> |     |
| Never                                                                                        | 13% |
| Rarely/Sometimes                                                                             | 72% |
| Often/Most of the time                                                                       | 11% |
| Not Sure                                                                                     | 4%  |
| <b>Current Position:</b>                                                                     |     |
| Assistant Professor                                                                          | 24% |
| Associate Professor                                                                          | 23% |
| Full Professor                                                                               | 48% |
| Non-tenure-track academic                                                                    | 5%  |
| <b>Male</b>                                                                                  | 74% |
| <b>Field of Study:</b>                                                                       |     |
| Mathematics and physical science                                                             | 29% |
| Life Science                                                                                 | 30% |
| Engineering and computer Science                                                             | 35% |
| Social Sciences and others                                                                   | 6%  |
| <b>Region of Institution:</b>                                                                |     |
| West                                                                                         | 19% |
| Midwest                                                                                      | 24% |
| Northeast                                                                                    | 21% |
| South                                                                                        | 37% |
| <b>Type of Institution:</b>                                                                  |     |
| Public                                                                                       | 70% |
| Private                                                                                      | 30% |

---

Note: Based on the larger analytic sample focusing on intentions of relocating abroad.

1: Among those ever-awardees of grants from US government agencies, 45% indicated intentions to avoid federal grants.

### **Supplementary Materials 3: Comparison of the AASF Survey to Two Other Surveys**

Two additional surveys on the same topic were conducted: the University of Arizona survey and the University of Michigan survey. For simplicity, we will refer to the first survey as the UA survey and the second survey as the UM survey. In Table S3, we compare the sampling methods of the three surveys in detail, using sources in (6,7). By survey standards, all of the three surveys are considered “convenience” samples. That is, they are not probability-based (which is the most desirable) samples because there is no national sampling frame from which a sample could be drawn. In addition, we do not know the response rate of the AASF survey. Because the AASF survey is a convenience sample with an unknown response rate, we acknowledge that the results can be subject to sampling and response biases.

Table S3: Comparison of Methodology across the Three Surveys

|                             | AASF Survey                                                                                                                                                                                                                                                                                                                                                               | University of Michigan (UM) Survey                                                                                                                                                                                                                          | University of Arizona (UA) Survey                                                                                                                                                                                                                                                                                                                                                                                                                                                                                                                                                                                                                    |
|-----------------------------|---------------------------------------------------------------------------------------------------------------------------------------------------------------------------------------------------------------------------------------------------------------------------------------------------------------------------------------------------------------------------|-------------------------------------------------------------------------------------------------------------------------------------------------------------------------------------------------------------------------------------------------------------|------------------------------------------------------------------------------------------------------------------------------------------------------------------------------------------------------------------------------------------------------------------------------------------------------------------------------------------------------------------------------------------------------------------------------------------------------------------------------------------------------------------------------------------------------------------------------------------------------------------------------------------------------|
| Survey Distribution Methods | (1) AASF asked all its 55 members to forward the invitation message with the link to the survey to Chinese-American faculty members in their networks;<br>(2) AASF emailed to the presidents of the 11 Chinese-American professional associations that co-sponsored the AASF webinar series, asking them to forward the survey to their members (see below for the list). | "Invitations were sent to 927 members of Asian/Chinese faculty associations at five universities: University of Michigan, Michigan State, Iowa State, Columbia, and Notre Dame" (according to the slides shared by the University of Michigan survey team). | (1) "The University of Arizona and the Committee of 100 administered a national survey between May and July 2021 among scientists in top US universities, including faculty, post-doctoral fellows (postdocs), and graduate students. ... The survey was sent to: a) all Chinese name scientists; and b) a random sample of non-Chinese name scientists across 83 US universities. ...<br>(2) In order to purposely oversample Chinese scientists for comparison, we sent the survey invitation through email to the entire Chinese name group, and an equivalent number of randomly selected scientists from the non-Chinese name group." (7, p.29) |
| Sample Size                 | 1,394 valid responses in total, including 1,304 Chinese-American faculty members (unknown response rate).                                                                                                                                                                                                                                                                 | 295 full responses (32% response rate).                                                                                                                                                                                                                     | 1,060 responses from scientists with Chinese surnames and 889 responses from scientists with non-Chinese surnames. Total sample size is 1,949 (6.8% overall response rate).                                                                                                                                                                                                                                                                                                                                                                                                                                                                          |
| Survey-Fielding Dates       | December 2021–March 2022                                                                                                                                                                                                                                                                                                                                                  | July–August 2021                                                                                                                                                                                                                                            | May–July 2021                                                                                                                                                                                                                                                                                                                                                                                                                                                                                                                                                                                                                                        |
| Sample Composition          | Chinese faculty members at US institutions nationwide (excluding students)                                                                                                                                                                                                                                                                                                | Asian/Chinese faculty members at five institutions (excluding students and postdocs)                                                                                                                                                                        | Chinese and non-Chinese faculty members, including postdocs and graduate students.                                                                                                                                                                                                                                                                                                                                                                                                                                                                                                                                                                   |

- Note: We thank Ann Lin and Duxin Sun at the University of Michigan for generously sharing the slides about the UM survey. Summary of the UA survey is based on the UA survey report on the Committee of 100 website (authored by J. J. Lee, X. Li and Staff at Committee of 100; the report is available at: <https://www.committee100.org/wp-content/uploads/2021/10/C100-Lee-Li-White-Paper-FINAL-FINAL-10.28.pdf>). List of associations that forwarded the AASF survey invitation: Association of Chinese Scholars in Computing, Chinese-American Chemistry & Chemical Biology Professors Association, Chinese-American Oceanic and Atmospheric Association, Chinese Biological Investigator Society (CBIS), International Chinese Statistical Association, North America Federation of Tsinghua Alumni Associations, Peking University Alumni Association of New England, Peking University Alumni Association of Washington DC, The Society of Chinese Bioscientists in America (SCBA), Tsinghua Alumni Academia Club of North America, US Chinese Scholar Association of Combustion Institute.



We further compare the main findings from the three surveys, summarized in Table S4. Because the AASF survey is primarily a survey of Chinese-origin academic scientists, we compare the results to those of “Chinese” scientists in the UA survey. Table S4 shows that all major findings, when they are comparable, are remarkably consistent across the three surveys. With different wordings for the question on feelings of safety, for example, 51% of the respondents in the AASF survey feel unsafe, 59% of the respondents in the UM survey do not feel safe, and 50.7% of the Chinese respondents in the UA survey feel fear/anxiety of being surveilled by the US government. The three surveys each collected information on respondents’ feelings toward applying for federal grants. In the AASF full analytical sample, 34% have considered avoiding applications for federal grants due to the current political climate in the US; in the UM sample, 28% have considered avoiding applying for federal grants; in the UA sample, 38.4% report having experienced more difficulty in obtaining research funding in the US as a result of their race/nationality/country of origin. Responses concerning intentions to leave the US are also consistent across the surveys: In the AASF survey, 46% intend to relocate to Asia, and 47% to non-Asian countries; in the UM survey, 32.2% have thought about moving to Asia, and 26.2% to Canada, Europe, Australia, or New Zealand; in the UA survey, 42.1% report that FBI investigations and the China Initiative have affected their plans to stay in the US. Similar consistency is found for other survey items of interest when they are comparable across the surveys.

Table S4: Comparison of Findings from the Three Surveys

|                                             | AASF Survey                                                                                                                                                                                                                                                                                                                                                                                                                                                                     | University of Michigan (UM) Survey                                                                                                                                                                                                                                                                                                                                                                                                                                             | University of Arizona (UA) Survey<br>(Chinese only)                                                                                                            |
|---------------------------------------------|---------------------------------------------------------------------------------------------------------------------------------------------------------------------------------------------------------------------------------------------------------------------------------------------------------------------------------------------------------------------------------------------------------------------------------------------------------------------------------|--------------------------------------------------------------------------------------------------------------------------------------------------------------------------------------------------------------------------------------------------------------------------------------------------------------------------------------------------------------------------------------------------------------------------------------------------------------------------------|----------------------------------------------------------------------------------------------------------------------------------------------------------------|
| Question: Do you feel safe...               | I currently feel safe as an academic researcher in the US.<br>Feel unsafe: 51%; unsure: 21%.                                                                                                                                                                                                                                                                                                                                                                                    | Do you feel safe as Chinese-origin academic researchers in the US?<br>Do not feel safe: 59%; not sure: 12%.                                                                                                                                                                                                                                                                                                                                                                    | Scientists who feel fear/anxiety of being surveilled by US gov't<br>50.7%.                                                                                     |
| Question: Reasons for not feeling safe...   | I do not feel safe because...<br><br>Because of the US gov't investigations into Chinese-origin researchers: 66%.<br><br>Because of anti-Asian violence in the US: 65%.<br><br>Because US gov't officials often attack the Chinese gov't or Chinese policies: 38%.<br><br>Because my family, friends, or collaborators might be targeted by <u>the U.S. or Chinese gov't</u> : 37%.<br><br>Because <u>others</u> might report what I say or do in the US to Chinese gov't: 31%. | I do not feel safe because...<br><br>Because of the US gov't investigations into Chinese-origin researchers: 56%.<br><br>Because of anti-Asian violence in the US: 55.9%.<br><br>Because US gov't officials often attack the Chinese gov't or Chinese policies: 29.4%.<br><br>Because <u>Chinese gov't</u> could target my family/friends/collaborators to retaliate: 10.7%.<br><br>Because <u>other Chinese</u> might report what I say or do in the US to Chinese gov't: 8%. |                                                                                                                                                                |
| Question: Research grants (broadly defined) | Have you considered <u>avoiding applications for federal grants</u> due to the current political climate in the US?<br><br>Yes, I have: 34% of the full analytic sample (N=1234); 45% of ever-awardees of federal grants (n=936).                                                                                                                                                                                                                                               | Have you considered <u>avoiding federal grants</u> ?<br><br>Yes, I have: 28% of the full analytic sample (N=295).                                                                                                                                                                                                                                                                                                                                                              | Scientists who experience more difficulty in obtaining <u>research funding in the US</u> as a result of their race/nationality/country of origin<br><br>38.4%. |
| Question: Intention to leave the US         | Intention of relocating abroad (either Asian or non-Asian Countries):                                                                                                                                                                                                                                                                                                                                                                                                           | Given current political environment in the US, thought about moving...                                                                                                                                                                                                                                                                                                                                                                                                         | Scientists who report that FBI investigations and/or the China Initiative affected their plans to stay in the US                                               |

|                                                                               |                                                                                                                                                                 |                                                                                                                                                                     |        |
|-------------------------------------------------------------------------------|-----------------------------------------------------------------------------------------------------------------------------------------------------------------|---------------------------------------------------------------------------------------------------------------------------------------------------------------------|--------|
|                                                                               | 61% overall. To Asia: 46%; to non-Asian countries: 47%.                                                                                                         | To Asia: 32.2%; to Canada, Europe, Australia or New Zealand: 26.2%.                                                                                                 | 42.1%. |
| Question: whether my university encouraged collaboration with China           | Before 2018, did you feel that the University encouraged collaboration in China?<br><br>80% of the 922 non-missing responses (56% of the full analytic sample). | Before 2018, did you feel that the University encouraged collaboration in China?<br><br>77% of the 139 non-missing responses (i.e., 36% of the full survey sample). |        |
| Question: whether my university still encourages collaboration with China now | Do you feel that this university currently encourages collaborations in China?<br><br>3.4% of the 916 non-missing responses (2.4% of the full analytic sample). | Do you feel that this university currently encourages collaborations in China?<br><br>9% of the 168 non-missing responses (5% of the full survey sample).           |        |

Sources: Based on (1) our calculations from the AASF analytic sample; (2) PowerPoint slides shared by the UM Survey research team via email; and (3) public report of the UA Survey posted on Committee of 100 website.

Note: In this table, we underlined comparable yet not identical questions asked across the three surveys.

## **Supplementary Materials 4: Trends in Migration of Chinese-American Scientists from the US to China**

We estimate the trends in the migration of US-based Chinese scientists to China by drawing on the large-scale academic bibliometrics database Microsoft Academic Graph (4), which indexed 208,440,142 scientists from 27,077 institutions authoring 205,203,354 scientific publications dated until December 2021.

We identified Chinese scientists by their surnames. We first collected 832 common Chinese surnames from Wikipedia ([https://en.wikipedia.org/wiki/List\\_of\\_common\\_Chinese\\_surnames](https://en.wikipedia.org/wiki/List_of_common_Chinese_surnames)), including those in Chinese characters and romanized names, in Hanyu Pinyin (the system of Chinese romanization mostly used by mainland Chinese scientists) and Wade–Giles (the system mostly used by Cantonese-speaking and Taiwanese scientists). This methodology results in the non-counting of Chinese scientists who have changed their surnames (usually females after marriage), leading to an undercount.

We searched for those surnames in the authors' full names recorded in Microsoft Academic Graph to identify Chinese scientists. To retain a high degree of reliability in individual identification, we removed scientists with a gap of more than 5 years between consecutive publications, which we believed were false results in which Microsoft Academic Graph's name disambiguation algorithm incorrectly merged multiple individuals. We ended up with 9,413,917 Chinese scientists, among which 1,613,311 had their first publications in US affiliations. By integrating the country labels deduced from affiliations, as detailed below, we were able to narrow down our focus to a list of 25,202 Chinese scientists who dropped their US affiliations and subsequently published at least one paper affiliated with China.

Microsoft Academic Graph records every paper with one or more field labels from a total of 716,883 possible fields, such as “message passing” or “quantum process.” Along with those labels comes a tree-like structure grouping small fields into 19 first-level fields and 292 second-level fields. We mapped all those first- and second-level fields to 4 major disciplines: mathematics and physical science (including statistics), life science, engineering and computer science, and social sciences and others, following the classification in Xie and Shauman’s book *Women in Science* (5), shown in Table S5.

Table S5: Grouping Microsoft Academic Graph fields into 4 major disciplines.

| Major disciplines                | Microsoft Academic Graph first-level field | Microsoft Academic Graph second-level field                                                                                                                                                                                                                                                                                                                                                                                                                                                                                                                                                                                                                                                                                                                                                                                                                                                                                                                                                                                                                                                                                                                                                                                                                                                                                                                                                                                                                                                 |
|----------------------------------|--------------------------------------------|---------------------------------------------------------------------------------------------------------------------------------------------------------------------------------------------------------------------------------------------------------------------------------------------------------------------------------------------------------------------------------------------------------------------------------------------------------------------------------------------------------------------------------------------------------------------------------------------------------------------------------------------------------------------------------------------------------------------------------------------------------------------------------------------------------------------------------------------------------------------------------------------------------------------------------------------------------------------------------------------------------------------------------------------------------------------------------------------------------------------------------------------------------------------------------------------------------------------------------------------------------------------------------------------------------------------------------------------------------------------------------------------------------------------------------------------------------------------------------------------|
| Engineering and computer science | Engineering, Computer science              | Aerospace engineering, Biochemical engineering, Electrical engineering, Chemical engineering, Process engineering, Geotechnical engineering, Manufacturing engineering, Computer vision, Data mining, Computational science, Information retrieval, Computer security, Knowledge management, Civil engineering, Forensic engineering, Library science, Speech recognition, Operations research, Marine engineering, Reliability engineering, Mining engineering, Simulation, Telecommunications, Operating system, World Wide Web, Parallel computing, Systems engineering, Waste management, Transport engineering, Control engineering, Architectural engineering, Mechanical engineering, Construction engineering, Automotive engineering, Pattern recognition, Engineering physics, Process management, Machine learning, Computer engineering, Programming language, Human-computer interaction, Computer network, Engineering ethics, Petroleum engineering, Aeronautics, Structural engineering, Theoretical computer science, Nuclear engineering, Computer architecture, Computer graphics (images), Pulp and paper industry, Database, Internet privacy, Natural language processing, Data science, Real-time computing, Distributed computing, Algorithm, Embedded system, Artificial intelligence, Engineering management, Agricultural engineering, Industrial engineering, Electronic engineering, Multimedia, Computer hardware, Software engineering, Engineering drawing. |
| Life science                     | Environmental science,                     | Environmental planning, Molecular biology, Oncology, Virology, Bioinformatics, Environmental health, Medical emergency, Urology, Pathology, Biological system, Immunology, Cancer                                                                                                                                                                                                                                                                                                                                                                                                                                                                                                                                                                                                                                                                                                                                                                                                                                                                                                                                                                                                                                                                                                                                                                                                                                                                                                           |

|                                        |                                                                                                         |                                                                                                                                                                                                                                                                                                                                                                                                                                                                                                                                                                                                                                                                                                                                                                                                                                                                                                                                                                                                                                                                                                                                                                                                                                                                                                                         |
|----------------------------------------|---------------------------------------------------------------------------------------------------------|-------------------------------------------------------------------------------------------------------------------------------------------------------------------------------------------------------------------------------------------------------------------------------------------------------------------------------------------------------------------------------------------------------------------------------------------------------------------------------------------------------------------------------------------------------------------------------------------------------------------------------------------------------------------------------------------------------------------------------------------------------------------------------------------------------------------------------------------------------------------------------------------------------------------------------------------------------------------------------------------------------------------------------------------------------------------------------------------------------------------------------------------------------------------------------------------------------------------------------------------------------------------------------------------------------------------------|
|                                        | Medicine,<br>Biology                                                                                    | research, Botany, Physical medicine and rehabilitation, Dermatology, Biochemistry, Pharmacology, Animal science, Soil science, Andrology, Agricultural science, Gastroenterology, Ophthalmology, Paleontology, Biotechnology, Food science, Toxicology, Optometry, Orthodontics, Genetics, Risk analysis (engineering), Gerontology, Internal medicine, Cardiology, Neuroscience, Family medicine, Veterinary medicine, Microbiology, Medical education, Medical physics, Physiology, Surgery, Dentistry, Agronomy, Zoology, Biomedical engineering, Cell biology, Ecology, Psychiatry, Obstetrics, Astrobiology, Horticulture, Environmental protection, Traditional medicine, Gynecology, Clinical psychology, Computational biology, Evolutionary biology, Anatomy, Intensive care medicine, Audiology, Biophysics, General surgery, Radiology, Pediatrics, Water resource management, Physical therapy, Agroforestry, Nursing, Environmental engineering, Anesthesia, Environmental resource management, Fishery, Nuclear medicine, Endocrinology, Emergency medicine.                                                                                                                                                                                                                                              |
| Mathematics<br>and physical<br>science | Physics,<br>Geography,<br>Chemistry,<br>Materials<br>science,<br>Geology,<br>Mathematics,<br>Statistics | Earth science, Geochemistry, Hydrology, Environmental chemistry, Particle physics, Applied mathematics, Combinatorics, Mathematical analysis, Analytical chemistry, Condensed matter physics, Photochemistry, Oceanography, Cartography, Algebra, Pure mathematics, Nuclear chemistry, Quantum mechanics, Composite material, Mechanics, Astronomy, Crystallography, Inorganic chemistry, Polymer chemistry, Nanotechnology, Forestry, Physical geography, Combinatorial chemistry, Discrete mathematics, Mathematics education, Atomic physics, Petrology, Arithmetic, Theoretical physics, Geometry, Quantum electrodynamics, Statistical physics, Computational chemistry, Archaeology, Economic geography, Nuclear magnetic resonance, Control theory, Polymer science, Seismology, Calculus, Mathematical physics, Stereochemistry, Classical mechanics, Astrophysics, Medicinal chemistry, Metallurgy, Geodesy, Acoustics, Remote sensing, Mathematical optimization, Topology, Meteorology, Statistics, Optics, Radiochemistry, Molecular physics, Nuclear physics, Computational physics, Chemical physics, Geophysics, Optoelectronics, Climatology, Geomorphology, Physical chemistry, Organic chemistry, Chromatography, Thermodynamics, Mineralogy, Ceramic materials, Atmospheric sciences, Biostatistics. |
| Social<br>sciences and<br>others       | Art, Sociology,<br>Economics,<br>Political science,<br>Philosophy,<br>History,                          | Art history, Commerce, Environmental ethics, Environmental economics, Social psychology, Aesthetics, International trade, Finance, Economic system, Gender studies, Psychoanalysis, International economics, Econometrics, Welfare economics, Financial economics, Ethnology, Social science, Socioeconomics, Applied psychology, Political economy, Management science,                                                                                                                                                                                                                                                                                                                                                                                                                                                                                                                                                                                                                                                                                                                                                                                                                                                                                                                                                |

|  |                      |                                                                                                                                                                                                                                                                                                                                                                                                                                                                                                                                                                                                                                                                                                                                                                                                                                                                                                                                            |
|--|----------------------|--------------------------------------------------------------------------------------------------------------------------------------------------------------------------------------------------------------------------------------------------------------------------------------------------------------------------------------------------------------------------------------------------------------------------------------------------------------------------------------------------------------------------------------------------------------------------------------------------------------------------------------------------------------------------------------------------------------------------------------------------------------------------------------------------------------------------------------------------------------------------------------------------------------------------------------------|
|  | Psychology, Business | Economy, Visual arts, Marketing, Keynesian economics, Genealogy, Accounting, Literature, Regional science, Industrial organization, Demographic economics, Agricultural economics, Business administration, Management, Operations management, Classics, Mathematical economics, Anthropology, Media studies, Criminology, Actuarial science, Linguistics, Development economics, Economic history, Pedagogy, Public administration, Public economics, Market economy, Public relations, Positive economics, Demography, Humanities, Natural resource economics, Psychotherapist, Religious studies, Theology, Economic policy, Advertising, Ancient history, Monetary economics, Economic growth, Financial system, Neoclassical economics, Law and economics, Law, Communication, Epistemology, Labor economics, Cognitive psychology, Classical economics, Microeconomics, Cognitive science, Developmental psychology, Macroeconomics. |
|--|----------------------|--------------------------------------------------------------------------------------------------------------------------------------------------------------------------------------------------------------------------------------------------------------------------------------------------------------------------------------------------------------------------------------------------------------------------------------------------------------------------------------------------------------------------------------------------------------------------------------------------------------------------------------------------------------------------------------------------------------------------------------------------------------------------------------------------------------------------------------------------------------------------------------------------------------------------------------------|

We leveraged Google Maps API to parse all 27,077 institution names in Microsoft Academic Graph, and retrieved their country labels. Therefore, we could label every Chinese scientist's working country in any publishing year. Specifically, we focused on Chinese scientists leaving the US, i.e., those who were trained in the US (first paper affiliated in the US) and who subsequently moved from the US to China (i.e., stopped using US affiliations and started to use Chinese affiliations). For each such scientist, we counted the year range of all his/her papers affiliated in the US and affiliated in China, and annotated his/her leaving year as the year of his/her first subsequent paper after his/her most recent usage of a US affiliation. This was more accurate than simply using his/her last year with a US affiliation, which might produce false positives that counted current US-based Chinese scientists. We further identified two groups of interest among US-based Chinese scientists: “junior” scientists—those who had published their first papers in the US, started publishing with Chinese affiliations within 5 years thereafter, and finally left the US within 7 years thereafter; and “experienced” scientists—those who had published over 25 papers in their whole career and outperformed 97% of scientists. Table S6

reports the yearly total number of US-based Chinese scientists who dropped US affiliation in each year since 2000. In Figures S1 to S3, we present the normalized trends for the groups as a whole and for the junior and experienced scientists.

Furthermore, we extend the focus to track the migrated Chinese-descent scientists out of the US to other countries, including China. Similarly, we identified a total of 19,955 Chinese-descent scientists who began their careers in the US but left for other countries, including China, during 2010-2021. The migration has increased during those 12 years, from 900 scientists in 2010 to 2,621 in 2021, with an accelerated departure rate (75% higher) in the last three years (Figure S4), coinciding with the launch of the China Initiative in 2018. Among the scientists of Chinese-descent who left the US in 2010, less than half (48%) moved to China mainland and Hong Kong, and 52% moved to other countries. However, the percentage of scientists moving to China has been increasing, especially in the past few years. For example, the percentage of Chinese-descent scientists who moved to China increased to two-third (67%) in 2021. The life sciences field has witnessed the most significant exodus, with over 1,021 life scientists who left in 2021 (Figure S5).

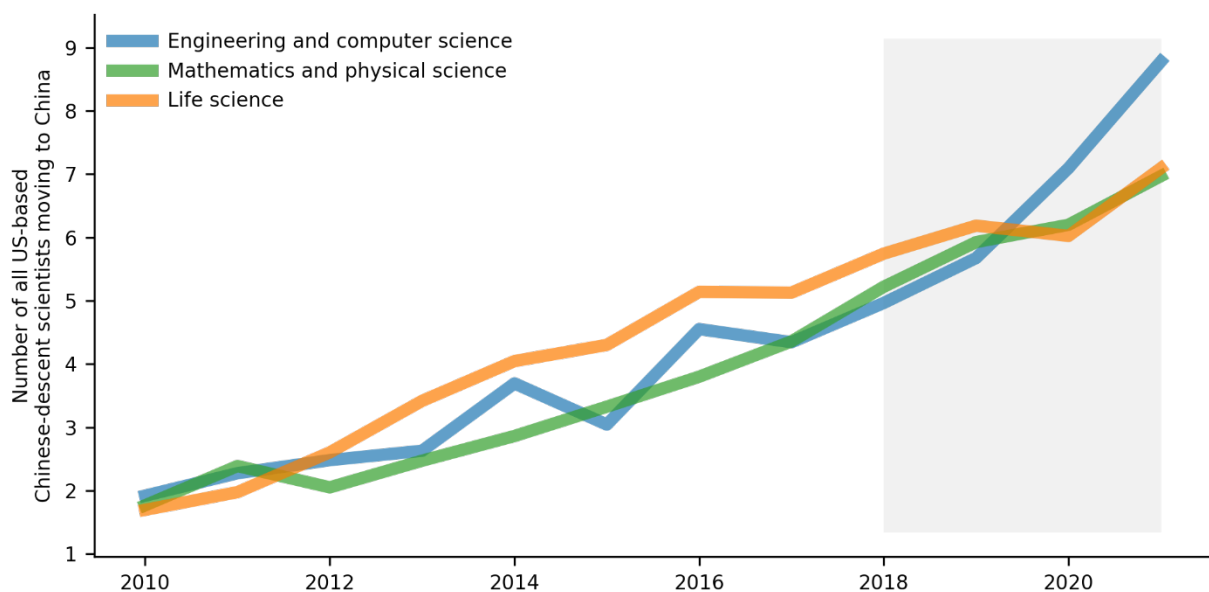



Figure S1: Trends in Chinese scientists migrating from the US to China. Number of all Chinese scientists leaving the US in each year from 2010 to 2021, normalized as ratios to the 2005–2010 level in each discipline.

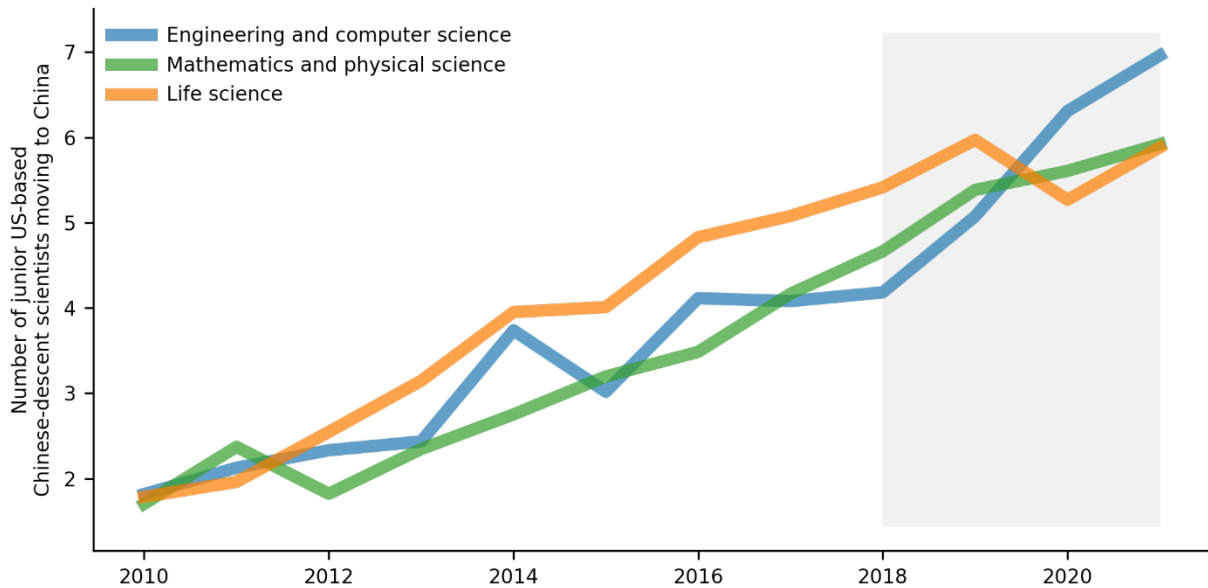

Figure S2: Trends in junior Chinese scientists migrating from the US to China. Number of junior Chinese scientists leaving the US in each year from 2010 to 2021, normalized as ratios to the 2005–2010 level in each discipline.

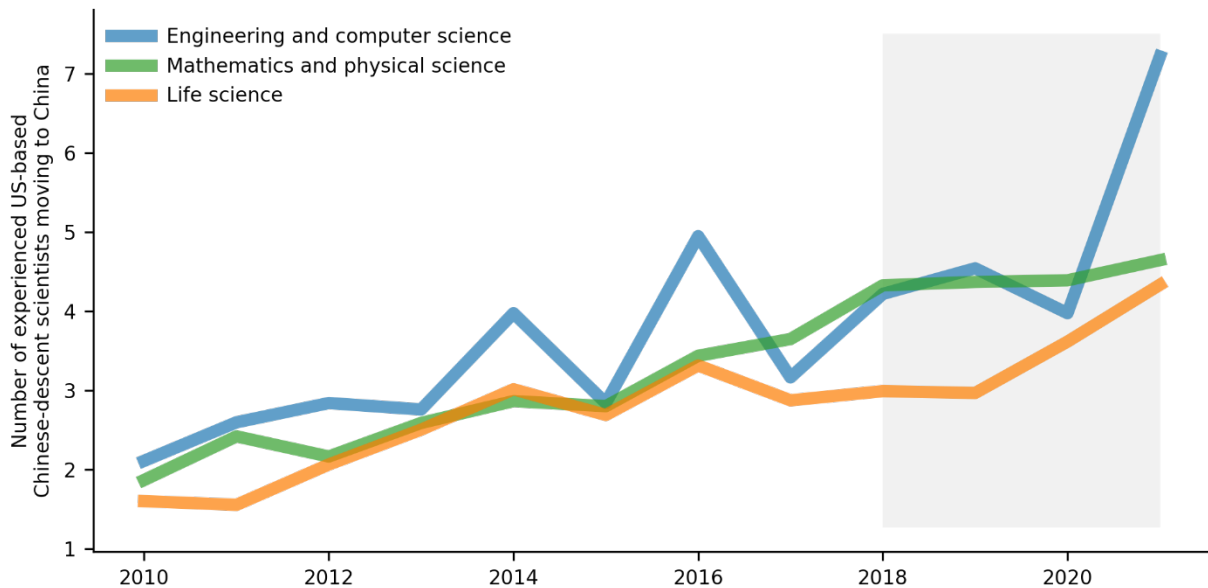

Figure S3: Trends in experienced Chinese scientists migrating from the US to China. Number of experienced Chinese scientists leaving the US in each year from 2010 to 2021, normalized as ratios to the 2005–2010 level in each discipline.

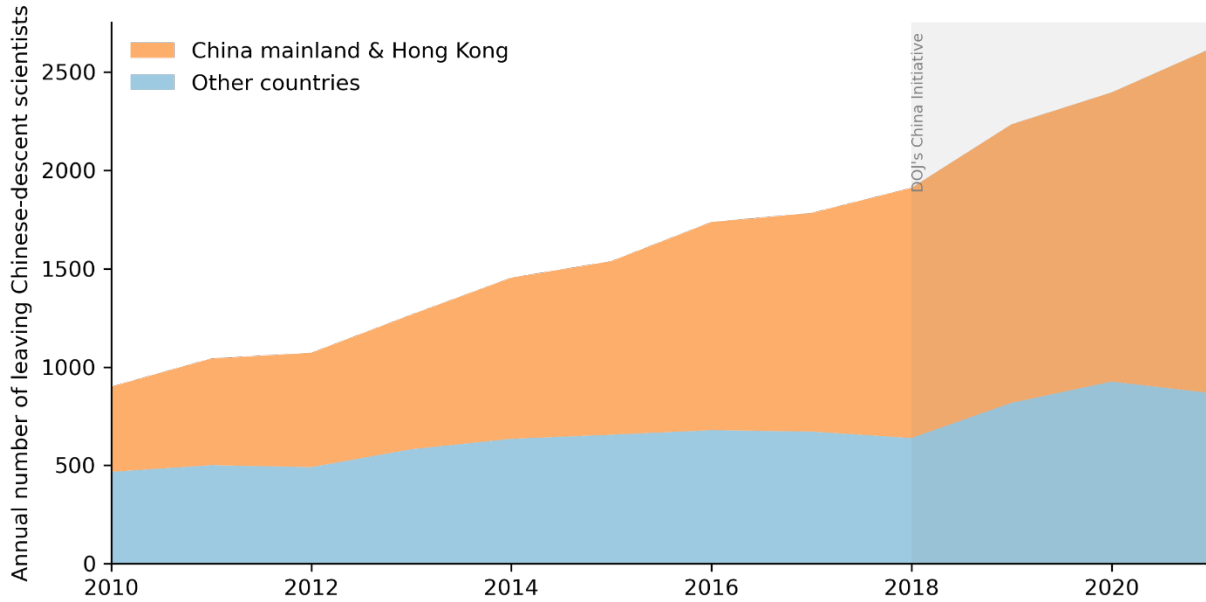

Figure S4: Annual number of Chinese-descent scientists who have left the US, categorized by destination country: China (mainland and Hong Kong) and other countries.

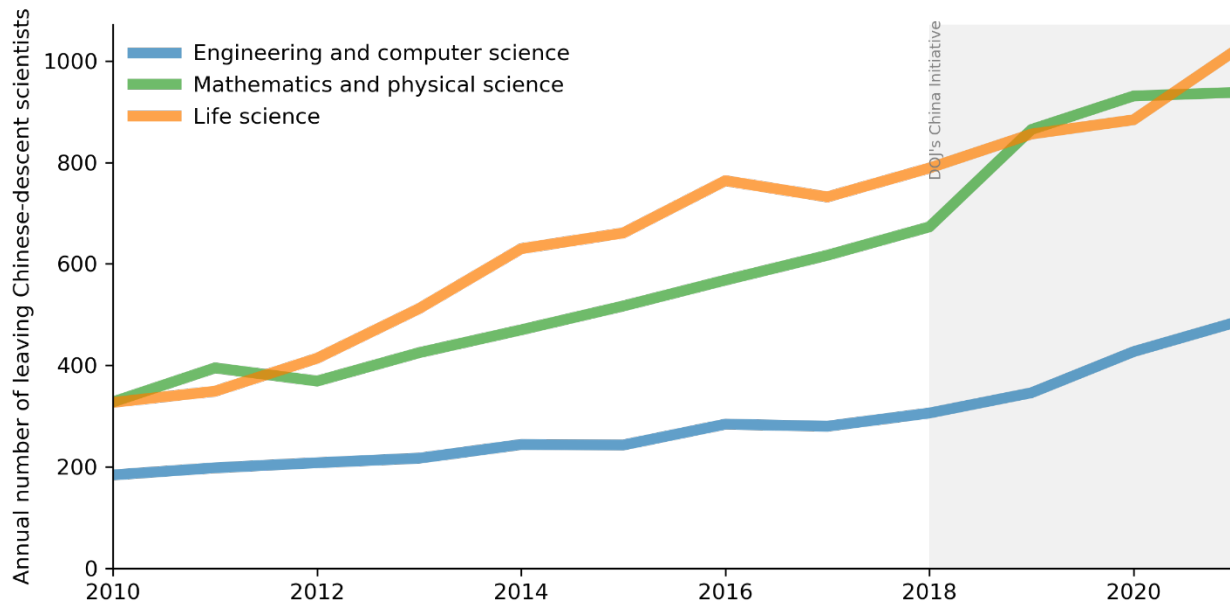

Figure S5: Annual number of Chinese-descent scientists who have left the US, categorized by discipline.

Table S6: Yearly number of US-based Chinese scientists who dropped US affiliations for China affiliations

|      | Engineering and<br>computer science | Mathematics and<br>physical science | Life<br>science | Social<br>sciences |
|------|-------------------------------------|-------------------------------------|-----------------|--------------------|
| 2000 | 3                                   | 20                                  | 4               | 0                  |
| 2001 | 1                                   | 27                                  | 12              | 0                  |
| 2002 | 3                                   | 18                                  | 8               | 1                  |
| 2003 | 9                                   | 18                                  | 23              | 1                  |
| 2004 | 13                                  | 34                                  | 36              | 3                  |
| 2005 | 15                                  | 50                                  | 31              | 2                  |
| 2006 | 17                                  | 63                                  | 50              | 2                  |
| 2007 | 23                                  | 66                                  | 77              | 6                  |
| 2008 | 31                                  | 103                                 | 90              | 9                  |
| 2009 | 52                                  | 120                                 | 122             | 12                 |
| 2010 | 65                                  | 168                                 | 146             | 9                  |
| 2011 | 77                                  | 227                                 | 170             | 17                 |
| 2012 | 84                                  | 195                                 | 224             | 24                 |
| 2013 | 89                                  | 235                                 | 294             | 23                 |
| 2014 | 125                                 | 272                                 | 348             | 30                 |
| 2015 | 103                                 | 316                                 | 370             | 28                 |
| 2016 | 154                                 | 361                                 | 442             | 40                 |
| 2017 | 147                                 | 414                                 | 441             | 48                 |
| 2018 | 168                                 | 496                                 | 494             | 54                 |
| 2019 | 192                                 | 563                                 | 532             | 67                 |
| 2020 | 240                                 | 589                                 | 518             | 46                 |
| 2021 | 297                                 | 662                                 | 610             | 71                 |

**Supplementary Materials 5: Evaluation of the AASF Survey Using ACS Data**

Because the AASF survey is a convenience sample, it may not be representative of its underlying population. To evaluate the representativeness of the AASF sample, we compare a few key sociodemographic characteristics of the AASF sample to the American Community Survey (ACS), the “gold standard” government survey conducted by the US Census Bureau (<https://www.census.gov/programs-surveys/acs/>). Unfortunately, there are only a limited number of variables that are available in both the AASF survey and the ACS survey (pooled annual files 2015–2019). We present the results of the evaluation in Table S7. Note that the sample size of the ACS survey is small due to the sample restriction. There are some small discrepancies. For example, we observe a higher proportion of respondents in engineering and computer science, and a lower proportion in life science, in the AASF survey than in the ACS. One possibility is that a high proportion of Chinese-origin life scientists are employed in non-tenure-track positions and thus were non-eligible for the AASF survey. Engineers and computer scientists are likely to be employed in tenure-track positions and are eager to participate in the AASF survey because they are impacted by the China Initiative. Further, the AASF sample is much older than the ACS sample. Compared to younger researchers, senior researchers are more likely to be approached by professional organizations to participate in the AASF survey, and they are more motivated to participate in the survey because they are more likely to be impacted by the China Initiative. Aside from these two discrepancies, the demographic representativeness of the AASF survey is overall adequate.

Table S7: Comparison of Demographic Characteristics between the AASF Survey and the American Community Survey (ACS) 2015–2019

| <b>Main Analytical Sample of AASF Survey Data (n=1299)</b> |     | <b>ACS 2015–19, Pooled Annual Samples (n=662)</b> |
|------------------------------------------------------------|-----|---------------------------------------------------|
| <b>Male</b>                                                | 74% | 61%                                               |
| <b>Field of Study:</b>                                     |     |                                                   |
| Formal/Physical Science and Statistics                     | 29% | 29%                                               |
| Life Science                                               | 30% | 46%                                               |
| Engineering and Computer Science                           | 35% | 18%                                               |
| Social Sciences/Others                                     | 6%  | 7%                                                |
| <b>Region of Institution:</b>                              |     |                                                   |
| West                                                       | 19% | 24%                                               |
| Midwest                                                    | 24% | 18%                                               |
| Northeast                                                  | 21% | 24%                                               |
| South                                                      | 37% | 33%                                               |
| <b>Age Category:</b>                                       |     |                                                   |
| 18–40                                                      | 30% | 63%                                               |
| 41–50                                                      | 33% | 20%                                               |
| 51–60                                                      | 28% | 12%                                               |
| 61+                                                        | 9%  | 4%                                                |

Notes: The pooled sample of American Community Survey (ACS 2015–19) is restricted to foreign-born respondents aged 18+, whose race is "Chinese," holding "doctoral degree," whose industry is "colleges and universities," and whose occupation is broadly defined as a "scientist." Unfortunately, we cannot further restrict the ACS sample to those who hold tenure-track positions versus non-tenure-track positions.

## Supplementary Materials 6: Explaining Stated Intentions

TABLE S8 Logistic Regression Models Predicting Scholars' Intentions of Avoiding Applying for Federal Grants and of Relocating Abroad

|                                                                                                      | <i>Scholar Intentions</i>            |          |                   |          |
|------------------------------------------------------------------------------------------------------|--------------------------------------|----------|-------------------|----------|
|                                                                                                      | Avoiding Federal Grants <sup>1</sup> |          | Relocating Abroad |          |
|                                                                                                      | Model 1A                             | Model 2A | Model 1B          | Model 2B |
| <b>Perceptions of Current Academic Climate:</b>                                                      |                                      |          |                   |          |
| Feel unwelcome as an academic researcher in the US                                                   |                                      | 0.465*   |                   | 0.505**  |
|                                                                                                      |                                      | (0.189)  |                   | (0.173)  |
| Do not feel safe as an academic researcher in the US                                                 |                                      | 0.807*** |                   | 0.727*** |
|                                                                                                      |                                      | (0.219)  |                   | (0.159)  |
| Fearful of conducting research in the US                                                             |                                      | 1.389*** |                   | 0.523**  |
|                                                                                                      |                                      | (0.187)  |                   | (0.166)  |
| Worried about collaborations with China                                                              |                                      | 0.794*** |                   | 0.529*** |
|                                                                                                      |                                      | (0.192)  |                   | (0.148)  |
| It is more difficult to recruit top international students now                                       |                                      | 0.493+   |                   | 0.535**  |
|                                                                                                      |                                      | (0.274)  |                   | (0.193)  |
| Received disclosure inquiries from my institution in the last two years                              |                                      | -0.206   |                   | 0.029    |
|                                                                                                      |                                      | (0.166)  |                   | (0.140)  |
| <b>Sense of Belonging to Local Institution and Professional Community (ref. Feel that I belong):</b> |                                      |          |                   |          |
| Neutral                                                                                              |                                      | -0.154   |                   | 0.392*   |
|                                                                                                      |                                      | (0.196)  |                   | (0.161)  |
| Feel that I don't belong                                                                             |                                      | 0.234    |                   | 0.412+   |
|                                                                                                      |                                      | (0.269)  |                   | (0.223)  |
| <b>How Often Have You Been Bullied under Professional Settings Last Year? (ref. Never)</b>           |                                      |          |                   |          |
| Rarely/Sometimes                                                                                     |                                      | 0.098    |                   | 0.091    |

|                                                                                                            |  |          |          |          |
|------------------------------------------------------------------------------------------------------------|--|----------|----------|----------|
|                                                                                                            |  | (0.230)  |          | (0.185)  |
| Often/Most of the time                                                                                     |  | 0.864*   |          | 0.244    |
|                                                                                                            |  | (0.424)  |          | (0.361)  |
| Not sure                                                                                                   |  | 0.550    |          | 0.208    |
|                                                                                                            |  | (0.443)  |          | (0.327)  |
| <b>How Often Have You Been Insulted by Others under Non-professional Settings Last Year? (ref. Never):</b> |  |          |          |          |
| Rarely/Sometimes                                                                                           |  | 0.165    |          | 0.793*** |
|                                                                                                            |  | (0.300)  |          | (0.230)  |
| Often/Most of the time                                                                                     |  | 0.151    |          | 1.134**  |
|                                                                                                            |  | (0.424)  |          | (0.361)  |
| Not sure                                                                                                   |  | -0.477   |          | 0.614    |
|                                                                                                            |  | (0.567)  |          | (0.428)  |
| <b>Current Position (ref. Full Professor):</b>                                                             |  |          |          |          |
|                                                                                                            |  | -        |          |          |
| Assistant Professor                                                                                        |  | 0.779*** | -0.642** | 0.517*** |
|                                                                                                            |  | (0.190)  | (0.225)  | (0.157)  |
| Associate Professor                                                                                        |  | -0.223   | -0.045   | 0.368*   |
|                                                                                                            |  | (0.168)  | (0.201)  | (0.153)  |
| Non-tenure-track academic                                                                                  |  | -0.485   | 0.210    | -0.047   |
|                                                                                                            |  | (0.398)  | (0.460)  | (0.271)  |
|                                                                                                            |  |          |          | (0.311)  |
| <b>Male (ref. Female)</b>                                                                                  |  | 0.325+   | 0.089    | 0.236+   |
|                                                                                                            |  | (0.167)  | (0.200)  | (0.139)  |
|                                                                                                            |  |          |          | (0.159)  |
| <b>Field of Study (ref. Mathematics and physical science):</b>                                             |  |          |          |          |
|                                                                                                            |  | -        |          |          |
| Life science                                                                                               |  | -0.330+  | 0.792*** | 0.068    |
|                                                                                                            |  | (0.180)  | (0.218)  | (0.157)  |
| Engineering and computer science                                                                           |  | 0.493**  | 0.128    | -0.052   |
|                                                                                                            |  | (0.170)  | (0.202)  | (0.149)  |
| Social sciences/Others                                                                                     |  | 0.455    | -0.090   | 0.387    |
|                                                                                                            |  | (0.512)  | (0.627)  | (0.280)  |
|                                                                                                            |  |          |          | (0.314)  |

|                                                          |                     |                   |                    |                    |
|----------------------------------------------------------|---------------------|-------------------|--------------------|--------------------|
| <b>Region of Institution (ref. West)</b>                 |                     |                   |                    |                    |
| Midwest                                                  | 0.215<br>(0.210)    | 0.338<br>(0.247)  | 0.027<br>(0.184)   | 0.012<br>(0.205)   |
| Northeast                                                | -0.043<br>(0.224)   | 0.077<br>(0.262)  | -0.164<br>(0.194)  | -0.085<br>(0.216)  |
| South                                                    | -0.022<br>(0.192)   | 0.178<br>(0.229)  | 0.076<br>(0.170)   | 0.102<br>(0.190)   |
| <b>Public Institution (ref. Private Institution)</b>     |                     |                   |                    |                    |
|                                                          | 0.429**<br>(0.161)  | 0.474*<br>(0.191) | 0.138<br>(0.139)   | 0.079<br>(0.156)   |
| <b>Have Been Awarded a US Federal Grant (Ref. Never)</b> |                     |                   |                    |                    |
|                                                          |                     |                   | 0.433**<br>(0.154) | 0.494**<br>(0.178) |
| Constant                                                 | -0.681**<br>(0.259) | -<br>(0.474)      | -0.362<br>(0.268)  | -<br>(0.394)       |
| Observations                                             | 936                 | 934               | 1,234              | 1,229              |
| Pseudo R2                                                | 0.0503              | 0.259             | 0.0168             | 0.167              |

Notes: 1. the analytic sample for "avoiding federal grants" is restricted to those ever-awardees (past or current) of grants from US government agencies.  
Reporting the coefficients from logistic regression models; standard errors in parentheses; \*\*\* p<0.001, \*\* p<0.01, \* p<0.05, + p<0.10.



## Supplementary Materials 7: Explaining Fears

TABLE S9. Logistic Regression Models Predicting Scholars' Fears

|                                                                | <i>Indicators of Fear</i> |                    |                                |
|----------------------------------------------------------------|---------------------------|--------------------|--------------------------------|
|                                                                | Do Not Feel Safe          | Feel Unwelcome     | Fearful of Conducting Research |
|                                                                | Model 1                   | Model 2            | Model 3                        |
| <b>Current Position (ref. Full Professor):</b>                 |                           |                    |                                |
| Assistant Professor                                            | -0.233<br>(0.166)         | -0.198<br>(0.157)  | -0.525***<br>(0.157)           |
| Associate Professor                                            | -0.180<br>(0.164)         | -0.113<br>(0.153)  | -0.136<br>(0.150)              |
| Non-tenure Track Academic                                      | -0.455<br>(0.286)         | -0.234<br>(0.293)  | -0.733*<br>(0.306)             |
| <b>Field of Study (ref. Mathematics and physical science):</b> |                           |                    |                                |
| Life science                                                   | 0.144<br>(0.166)          | 0.307+<br>(0.163)  | 0.603***<br>(0.160)            |
| Engineering and computer science                               | 0.522**<br>(0.165)        | 0.414**<br>(0.154) | 0.743***<br>(0.153)            |
| Social science/Others                                          | -0.313<br>(0.275)         | 0.344<br>(0.281)   | 0.385<br>(0.289)               |
| <b>Male (ref. Female)</b>                                      | 0.218<br>(0.147)          | 0.219<br>(0.145)   | 0.389**<br>(0.143)             |
| <b>Region of Institution (ref. West)</b>                       |                           |                    |                                |
| Midwest                                                        | -0.187                    | 0.020              | -0.067                         |

|                                                          |         |           |           |
|----------------------------------------------------------|---------|-----------|-----------|
|                                                          | (0.204) | (0.185)   | (0.184)   |
| Northeast                                                | -0.254  | -0.083    | -0.044    |
|                                                          | (0.214) | (0.201)   | (0.197)   |
| South                                                    | -0.200  | -0.033    | -0.116    |
|                                                          | (0.188) | (0.171)   | (0.170)   |
| <b>Public Institution (ref. Private Institution)</b>     | 0.143   | 0.329*    | 0.190     |
|                                                          | (0.150) | (0.145)   | (0.141)   |
| <b>Have Been Awarded a US Federal Grant (Ref. Never)</b> | -0.019  | -0.000    | 0.346*    |
|                                                          | (0.166) | (0.159)   | (0.161)   |
| Constant                                                 | 0.808** | -1.156*** | -1.240*** |
|                                                          | (0.289) | (0.279)   | (0.278)   |
| Observations                                             | 1,234   | 1,234     | 1,234     |
| Pseudo R2                                                | 0.0195  | 0.0133    | 0.0431    |

Reporting the coefficients from logistic regression models; standard errors in parentheses.

\*\*\*  $p < 0.001$ , \*\*  $p < 0.01$ , \*  $p < 0.05$ , +  $p < 0.10$ .

### Supplementary Materials 8: Reasons for Fear

Reasons for Not Feeling Safe as an Academic Researcher in the U.S.

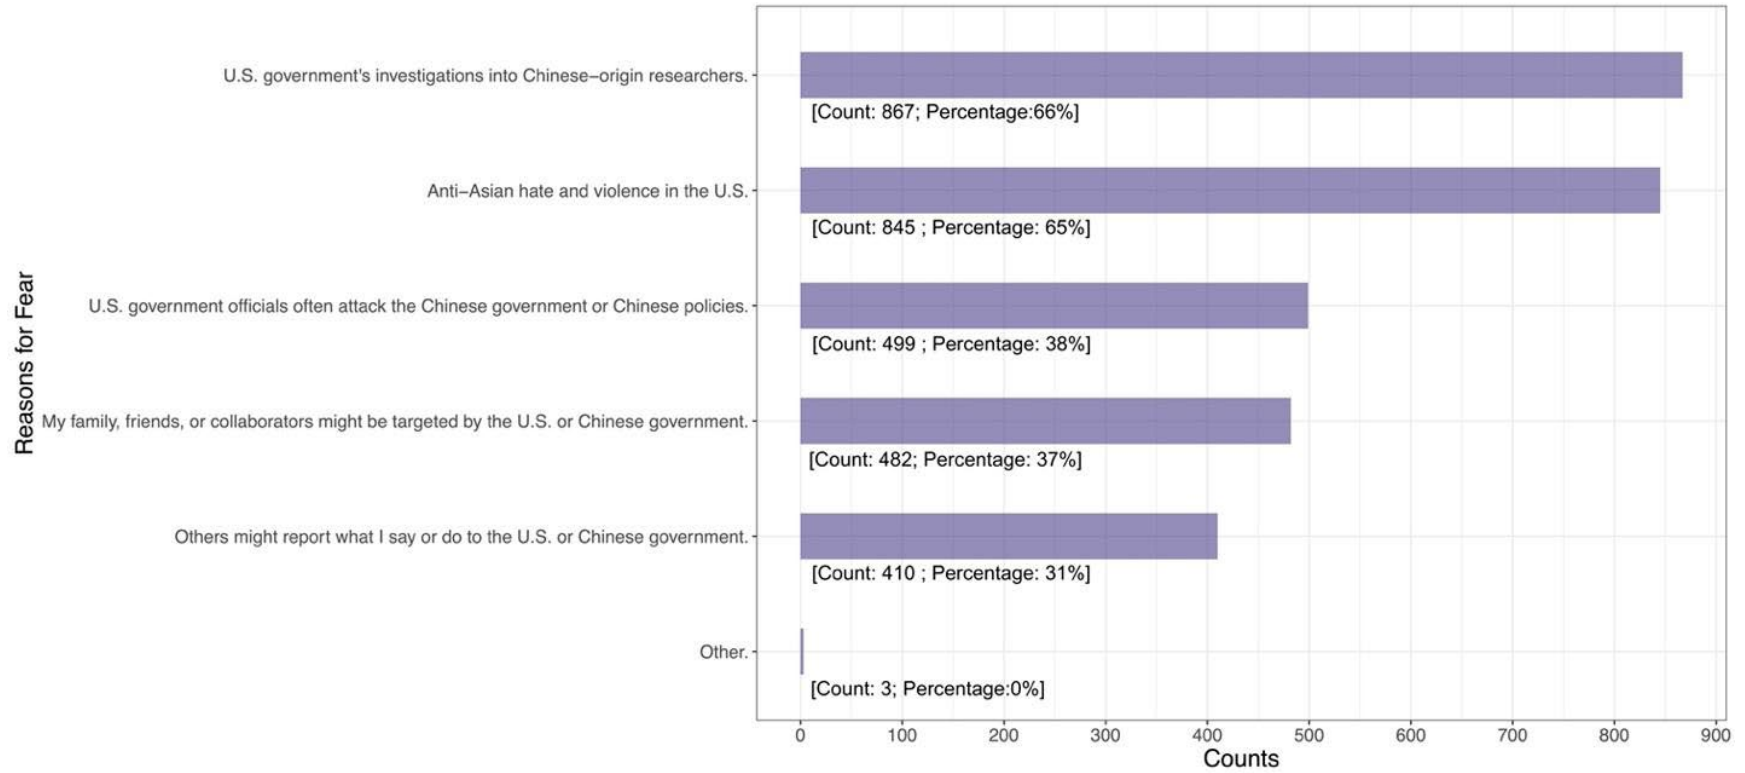

Figure S6: Reasons for not feeling safe as an academic researcher in the US

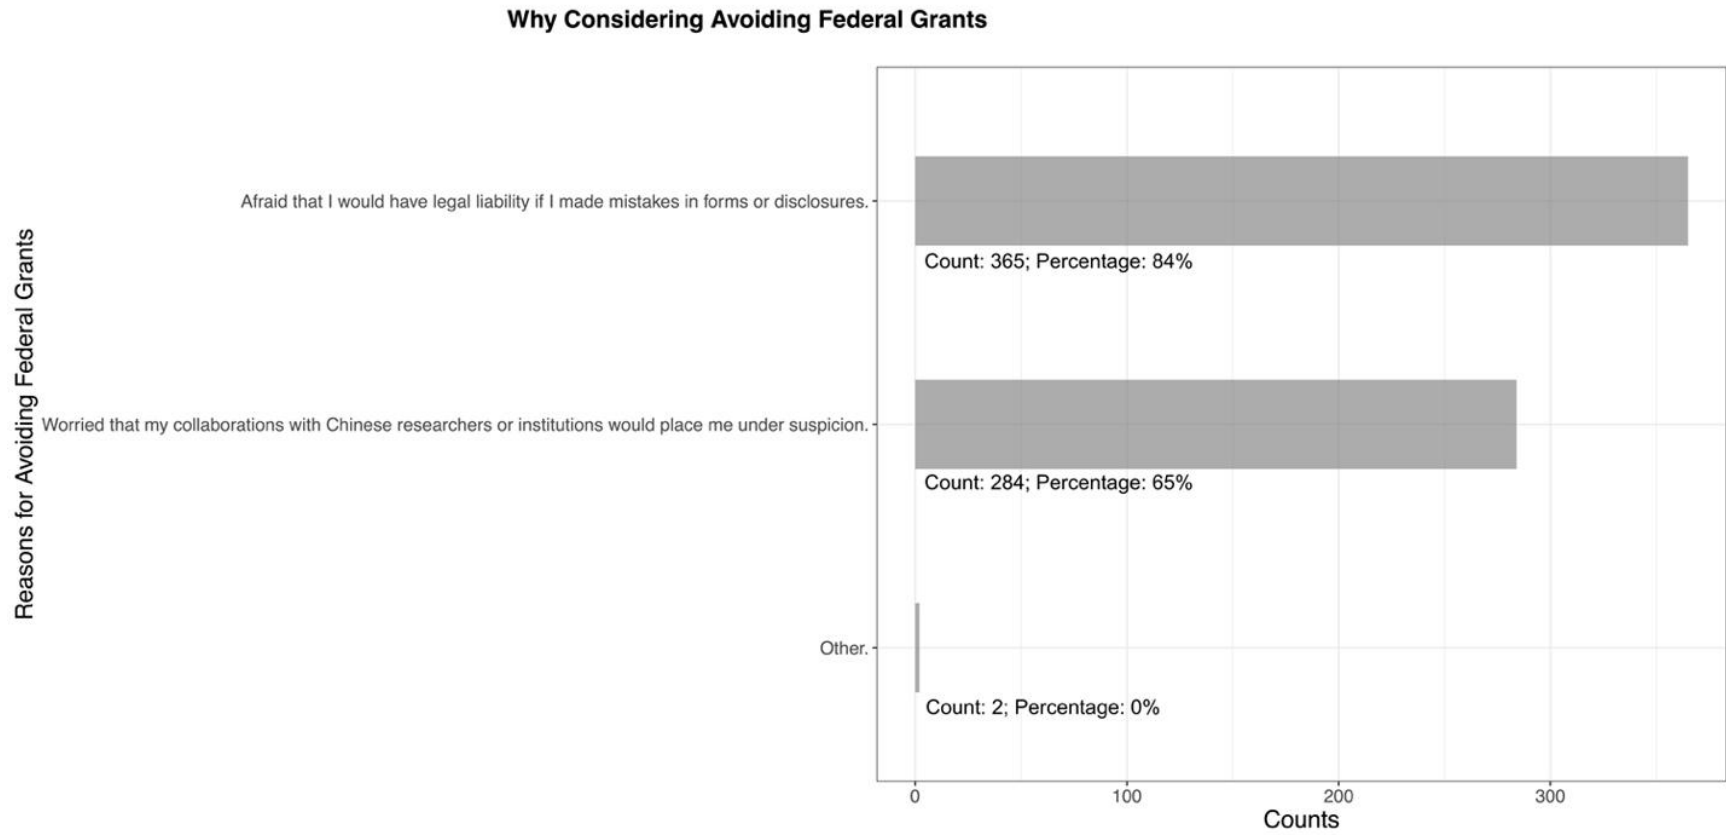

Figure S7: Reasons for considering avoiding applying for federal grants (N=436)

## Supplementary Materials 9: Gender and Field Differences

Table S10. Logistic Regression Models Predicting Reasons for Not Feeling Safe as an Academic Researcher in the US: Robustness Checks for Potential Gender Differences

| VARIABLES                                                      | (1)<br>Whyfear1     | (2)<br>Whyfear2    | (3)<br>Whyfear3    | (4)<br>Whyfear4    | (5)<br>Whyfear5    |
|----------------------------------------------------------------|---------------------|--------------------|--------------------|--------------------|--------------------|
| <b>Male (ref. Female)</b>                                      | -0.007<br>(0.141)   | 0.243+<br>(0.141)  | 0.011<br>(0.140)   | -0.051<br>(0.146)  | 0.247+<br>(0.143)  |
| Current Position (ref. Full Professor):                        |                     |                    |                    |                    |                    |
| Assistant Professor                                            | -0.057<br>(0.156)   | -0.271+<br>(0.158) | -0.006<br>(0.154)  | -0.102<br>(0.161)  | -0.018<br>(0.155)  |
| Associate Professor                                            | -0.083<br>(0.153)   | -0.332*<br>(0.155) | 0.035<br>(0.151)   | -0.013<br>(0.157)  | 0.084<br>(0.151)   |
| Non-tenure Track Academic                                      | -0.121<br>(0.280)   | -0.237<br>(0.280)  | 0.471+<br>(0.272)  | -0.060<br>(0.294)  | -0.008<br>(0.284)  |
| <b>Field of Study (ref. Mathematics and physical science):</b> |                     |                    |                    |                    |                    |
| Life science                                                   | 0.332*<br>(0.157)   | 0.295+<br>(0.161)  | 0.211<br>(0.158)   | 0.319+<br>(0.168)  | 0.393*<br>(0.161)  |
| Engineering and computer science                               | 0.546***<br>(0.152) | 0.426**<br>(0.154) | 0.148<br>(0.150)   | 0.465**<br>(0.158) | 0.457**<br>(0.153) |
| Social science/Others                                          | -0.132<br>(0.269)   | -0.253<br>(0.268)  | 0.149<br>(0.272)   | 0.245<br>(0.288)   | 0.256<br>(0.281)   |
| <b>Region of Institution (ref. West)</b>                       |                     |                    |                    |                    |                    |
| Midwest                                                        | 0.061<br>(0.190)    | -0.092<br>(0.191)  | 0.109<br>(0.182)   | -0.022<br>(0.192)  | 0.056<br>(0.186)   |
| Northeast                                                      | -0.211<br>(0.198)   | -0.099<br>(0.202)  | 0.026<br>(0.196)   | 0.084<br>(0.205)   | -0.098<br>(0.201)  |
| South                                                          | -0.132<br>(0.173)   | -0.051<br>(0.177)  | -0.072<br>(0.169)  | 0.060<br>(0.176)   | 0.221<br>(0.170)   |
| <b>Public Institution (ref. Private Institution)</b>           | 0.156<br>(0.141)    | 0.211<br>(0.143)   | 0.456**<br>(0.143) | 0.288+<br>(0.149)  | 0.084<br>(0.142)   |

|                                                          |         |         |           |           |           |
|----------------------------------------------------------|---------|---------|-----------|-----------|-----------|
| <b>Have Been Awarded a US Federal Grant (Ref. Never)</b> | -0.095  | 0.215   | -0.080    | -0.029    | 0.047     |
|                                                          | (0.158) | (0.156) | (0.154)   | (0.163)   | (0.158)   |
| Constant                                                 | 0.420   | 0.190   | -0.899*** | -1.200*** | -1.194*** |
|                                                          | (0.272) | (0.273) | (0.271)   | (0.285)   | (0.277)   |
| Observations                                             | 1,234   | 1,234   | 1,234     | 1,234     | 1,234     |
| Pseudo R2                                                | 0.0135  | 0.0219  | 0.0106    | 0.00907   | 0.0130    |

Standard errors in parentheses

\*\*\* p<0.001, \*\* p<0.01, \* p<0.05, + p<0.10

Notations for Dependent Variables (1) - (5):

Whyfear 1: I don't feel safe because of anti-Asian hate and violence in the U.S.

Whyfear 2: I don't feel safe because of US government's investigation into Chinese-origin researchers.

Whyfear 3: I don't feel safe because US government officials often attack the Chinese gov't/policies.

Whyfear 4: I don't feel safe because others might report what I say or do to the U.S. or Chinese gov't.

Whyfear 5: I don't feel safe because my family, friends, or collaborators might be targeted by the US or Chinese gov't.

**Table S11. Exploring differences by fields: Reasons for not feeling safe as an academic researcher in the US (% feeling fearful)**

|                                                                                   | Formal sciences | Life science | Engineering and CS | Social science |
|-----------------------------------------------------------------------------------|-----------------|--------------|--------------------|----------------|
| US government's investigation into Chinese-origin researchers                     | 63.06           | 67.97        | 71.49              | 49.41          |
| Anti-Asian hate and violence in the US                                            | 59.37           | 65.10        | 70.82              | 56.47          |
| US government officials often attack the Chinese gov't/policies                   | 35.88           | 38.80        | 39.64              | 41.18          |
| My family, friends, or collaborators might be targeted by the US or Chinese gov't | 31.13           | 39.06        | 40.98              | 34.12          |
| Others might report what I say or do to the US or Chinese government              | 27.44           | 31.25        | 35.63              | 30.59          |

**Table S12. Tabulation of intentions to avoid federal grants by fields (showing % within fields)**

|                                                                                            | Formal sciences | Life science | Engineering and CS | Social science |
|--------------------------------------------------------------------------------------------|-----------------|--------------|--------------------|----------------|
| Intention of avoiding federal grant applications (among those ever-awarded federal grants) | 42.81           | 33.86        | 54.79              | 45.00          |
| Intention of relocating outside the US                                                     | 60.95           | 61.72        | 61.16              | 64.71          |

**Supplementary Materials 10: Emerging Patterns from Open-ended Responses**

Table S13: Top 50 Frequent words

| Word           | Frequency |
|----------------|-----------|
| China          | 103       |
| Chinese        | 100       |
| Asian          | 72        |
| research       | 54        |
| feel           | 44        |
| university     | 38        |
| will           | 36        |
| academic       | 34        |
| scholars       | 34        |
| years          | 33        |
| students       | 32        |
| Americans      | 28        |
| faculty        | 28        |
| even           | 27        |
| many           | 27        |
| American       | 26        |
| colleagues     | 26        |
| government     | 24        |
| environment    | 24        |
| science        | 24        |
| scientists     | 23        |
| initiative     | 23        |
| collaboration  | 21        |
| past           | 20        |
| due            | 19        |
| discrimination | 19        |
| researchers    | 18        |
| now            | 18        |
| people         | 18        |
| leadership     | 17        |
| current        | 17        |
| time           | 16        |
| much           | 16        |
| also           | 16        |
| political      | 16        |
| work           | 16        |
| white          | 16        |
| worried        | 14        |
| since          | 14        |



|                |    |
|----------------|----|
| grant          | 14 |
| can            | 14 |
| one            | 14 |
| country        | 14 |
| universities   | 14 |
| international  | 13 |
| back           | 13 |
| funding        | 13 |
| know           | 13 |
| like           | 13 |
| collaborations | 12 |

---



## References

1. National Science Foundation. 2022. Survey of earned doctorates. Data tables. Table 17 (available at: <https://nces.nsf.gov/pubs/nsf22300/data-tables>).
2. National Science Foundation. 2022. Science and engineering doctorates. International students who intend to stay in the United States: What are the overall trends? (available at: <https://www.nsf.gov/statistics/2017/nsf17306/report/international-students-staying-overall-trends/stay-rates-country-of-origin.cfm#:~:text=Stay%20rates%20by%20characteristics,-Overall&text=Approximately%209%20in%2010%20doctorates,the%20United%20States%20after%20graduation>).
3. CEIC. 2022. (available at: <https://www.ceicdata.com/>).
4. Z. S.-J. Arnab Sinha. An Overview of Microsoft Academic Service (MAS) and Applications. *Proceedings of the 24th International Conference on World Wide Web (WWW '15 Companion)* (pp. 243–246) (New York, NY, USA: ACM, 2015).
5. Y. Xie, K. Shauman. 2003. *Women in Science*. (Harvard Univ. Press, Cambridge, MA, 2012).
